# Supplementary material for: A simple microfluidic platform for rapid and efficient production of the radiotracer [18F]fallypride
Source: Royal Society of Chemistry journal article supplement (doi:10.1039/c8lc00167g), 2018-01-01
Supplement: c8lc00167g1.pdf [file c8lc00167g1.pdf]

Electronic Supplementary Information (ESI)

## **A simple microfluidic platform for rapid and efficient production of the radiotracer [ $^{18}\text{F}$ ]fallypride**

Xin Zhang, Fei Liu, Karla-Anne Knapp, Michael L. Nickels, H. Charles Manning and  
Leon M. Bellan\*

Xin Zhang  
Department of Mechanical Engineering  
Vanderbilt University  
Nashville, TN, 37235, USA

Fei Liu  
Vanderbilt Center for Molecular Probes  
Vanderbilt University Medical Center  
Nashville, TN, 37232, USA

Karla-Anne Knapp  
Department of Chemistry, Vanderbilt Center for Molecular Probes  
Vanderbilt University Medical Center  
Nashville, TN, 37232, USA

Michael L. Nickels  
Vanderbilt Center for Molecular Probes, Vanderbilt University Institute of Imaging Science,  
Department of Radiology and Radiological Sciences  
Vanderbilt University Medical Center  
Nashville, TN, 37232, USA

H. Charles Manning  
Vanderbilt Center for Molecular Probes, Vanderbilt University Institute of Imaging Science,  
Department of Radiology and Radiological Sciences, Vanderbilt-Ingram Cancer Center,  
Chemistry, Biomedical Engineering, Neurosurgery and Chemical and Physical Biology  
Vanderbilt University Medical Center  
Nashville, TN, 37232, USA

Leon M. Bellan  
Departments of Mechanical and Biomedical Engineering  
Vanderbilt University  
Nashville, TN, 37235, USA

\*To whom correspondence should be addressed. E-mail: [leon.bellan@vanderbilt.edu](mailto:leon.bellan@vanderbilt.edu)

| <b>Volume of Beads (<math>\mu\text{l}</math>)</b> | <b>Initial syringe radioactivity (<math>\text{mCi}</math>)</b> | <b>Final syringe radioactivity (<math>\text{mCi}</math>)</b> | <b>Waste vial radioactivity (<math>\text{mCi}</math>)</b> | <b>Radioactivity trapped on chip (<math>\text{mCi}</math>)</b> | <b>Efficiency</b> |
|---------------------------------------------------|----------------------------------------------------------------|--------------------------------------------------------------|-----------------------------------------------------------|----------------------------------------------------------------|-------------------|
| 0.62                                              | 10.3                                                           | 0.6                                                          | 0.9                                                       | 8.93                                                           | 90.1%             |
| 0.62                                              | 8.7                                                            | 0.6                                                          | 0.7                                                       | 7.5                                                            | 92.2%             |
| 0.62                                              | 35.8                                                           | 1.8                                                          | 12.6                                                      | 21.5                                                           | 65%               |
| 0.62                                              | 39.1                                                           | 1.5                                                          | 14.3                                                      | 20.9                                                           | 59.7%             |
| 3                                                 | 95.7                                                           | 0.34                                                         | 0.01                                                      | 93.0                                                           | 97.7%             |
| 3                                                 | 128.6                                                          | 4.8                                                          | 0.1                                                       | 123.0                                                          | 95.9%             |

**Table S1** The relationship between the volume of anion exchange beads inside the concentration column and the radioactivity trapped on the microfluidic chip. All listed values are decay-corrected to the time point of initial radioactivity in the syringe.

| <b>Volume of <math>\text{K}_{222}</math> (<math>\mu\text{l}</math>)</b> | <b>On-chip radioactivity (<math>\text{mCi}</math>)</b> | <b>Released radioactivity (<math>\text{mCi}</math>)</b> | <b>radioactivity left on-chip (<math>\text{mCi}</math>)</b> | <b>Efficiency</b> |
|-------------------------------------------------------------------------|--------------------------------------------------------|---------------------------------------------------------|-------------------------------------------------------------|-------------------|
| 50                                                                      | 7.5                                                    | 4.8                                                     | 1.7                                                         | 74%               |
| 50                                                                      | 4.6                                                    | 3.58                                                    | 0.94                                                        | 77%               |
| 75                                                                      | 4.25                                                   | 3.84                                                    | 0.23                                                        | 95%               |
| 100                                                                     | 6.2                                                    | 5.48                                                    | 0.1                                                         | 98%               |

**Table S2** The relationship between the volume of  $\text{K}_{222}/\text{K}_2\text{CO}_3$  used for releasing trapped  $^{18}\text{F}$ fluoride off the concentration column and the releasing efficiency. The efficiency is calculated accounting for the decay of the radionuclide over time.

(a)

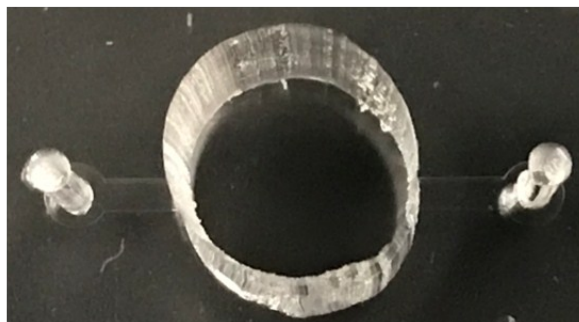

(b)

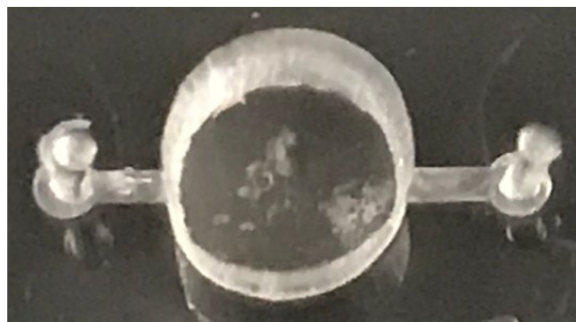

**Fig. S1** Photograph of on-chip reaction cavity with no reagent inside (a) and after water evaporation (b).

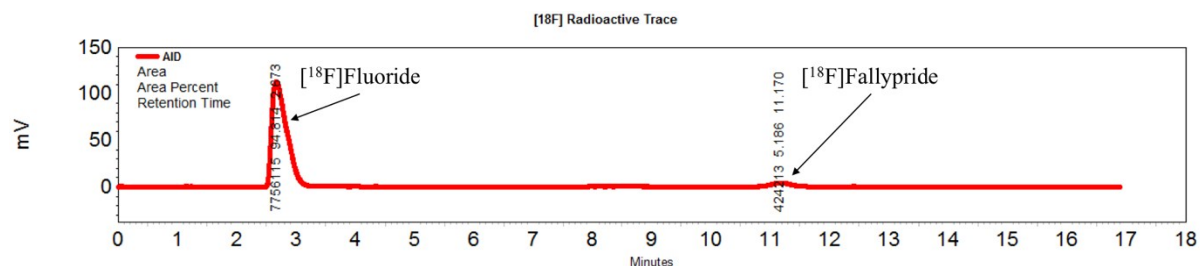

**Fig. S2** Radio-HPLC analysis of the waste mixture passed through the C<sub>18</sub> column. This injection was taken using the mixture solution flowing out from the purification column after labelling reaction. 95% [<sup>18</sup>F]Fluoride was washed off the purification column, and only 5% [<sup>18</sup>F]fallypride was lost at this step.

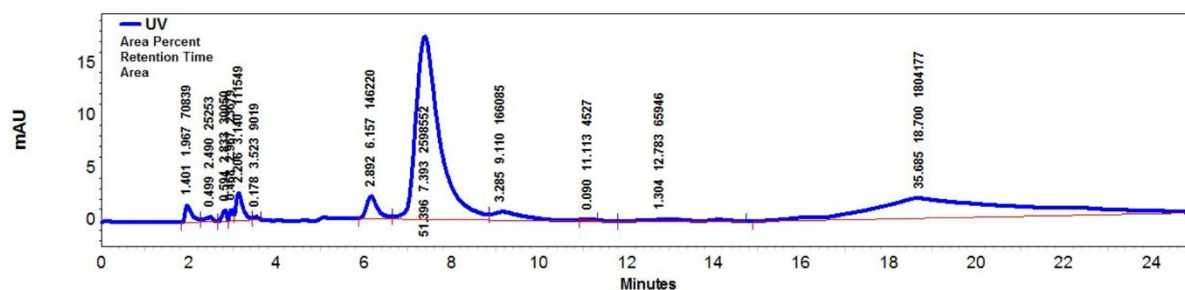

**Fig. S3** A typical UV spectrum for the purified [<sup>18</sup>F]fallypride, showing product peak at 11.11 min. The presence of minor impurities is observed throughout the spectrum.
